# Supplementary material for: Concatenated ScaA and TSA56 Surface Antigen Sequences Reflect Genome-Scale Phylogeny of Orientia tsutsugamushi: An Analysis Including Two Genomes from Taiwan
Source: MDPI journal article supplement (doi:10.3390/pathogens13040299), 2024-04-03
Supplement: s1 [file s1]

## Supplementary Materials

Concatenated ScaA and TSA56 Surface Antigen Sequences Reflect Genome-Scale Phylogeny of

*Orientia tsutsugamushi*: An Analysis Including Two Genomes from Taiwan

Nicholas T. Minahan<sup>1</sup>, Tsai-Ying Yen<sup>2</sup>, Yue-Liang Leon Guo<sup>1,3</sup>, Pei-Yun Shu<sup>2</sup> and Kun-Hsien Tsai<sup>1,4,\*</sup>

<sup>1</sup> Institute of Environmental and Occupational Health Sciences, College of Public Health, National Taiwan University, Taipei 100025, Taiwan; f05841021@ntu.edu.tw (N.T.M.); leonguo@ntu.edu.tw (Y.-L.L.G.)

<sup>2</sup> Centers for Diagnostics and Vaccine Development, Centers for Disease Control, Ministry of Health and Welfare, Taipei 115210, Taiwan; yenty@cdc.gov.tw (T.-Y.Y.); cdcpysu@gmail.com (P.-Y.S.)

<sup>3</sup> Department of Environmental and Occupational Medicine, National Taiwan University (NTU) College of Medicine and NTU Hospital, Taipei 100025, Taiwan

<sup>4</sup> Global Health Program, College of Public Health, National Taiwan University, Taipei 100025, Taiwan

\* Correspondence: kunhtsai@ntu.edu.tw

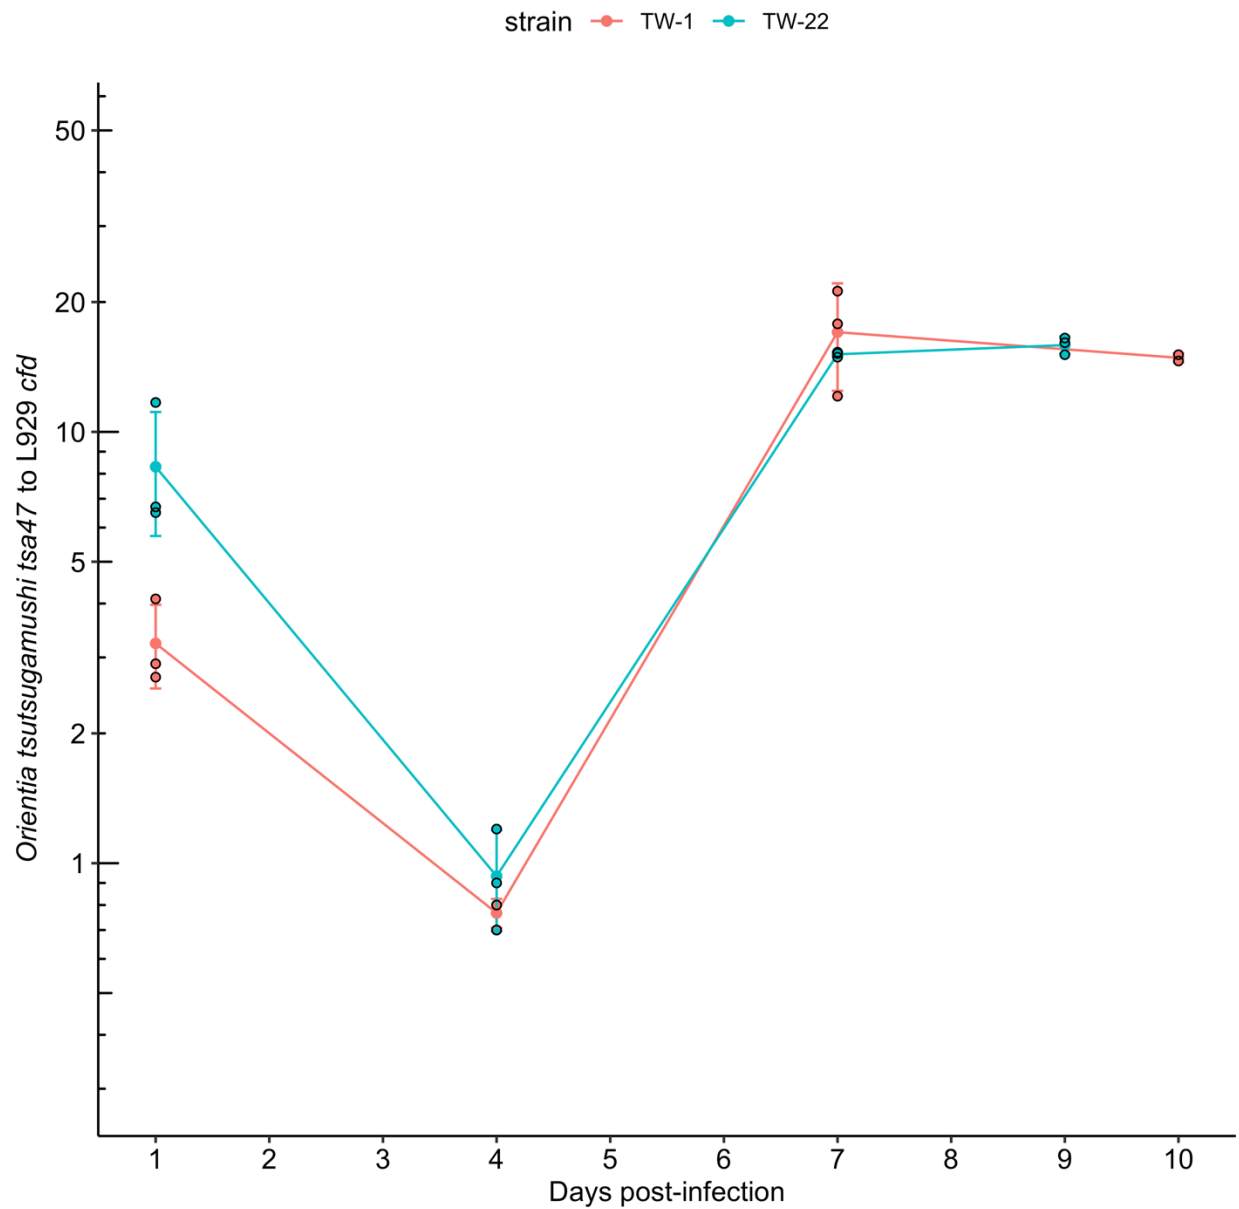

**Figure S1. Growth curves.** Mean ratio of *Orientia tsutsugamushi* (OT) to L929 cells in the supernatant of cultures (passage 8) of strains TW-1 and TW-22 based on single-copy targets. Each point represents mean values of triplicate measurements for an individual 75 cm<sup>2</sup> (T75) flask. Colored dots represent mean values, and error bars represent standard deviation.

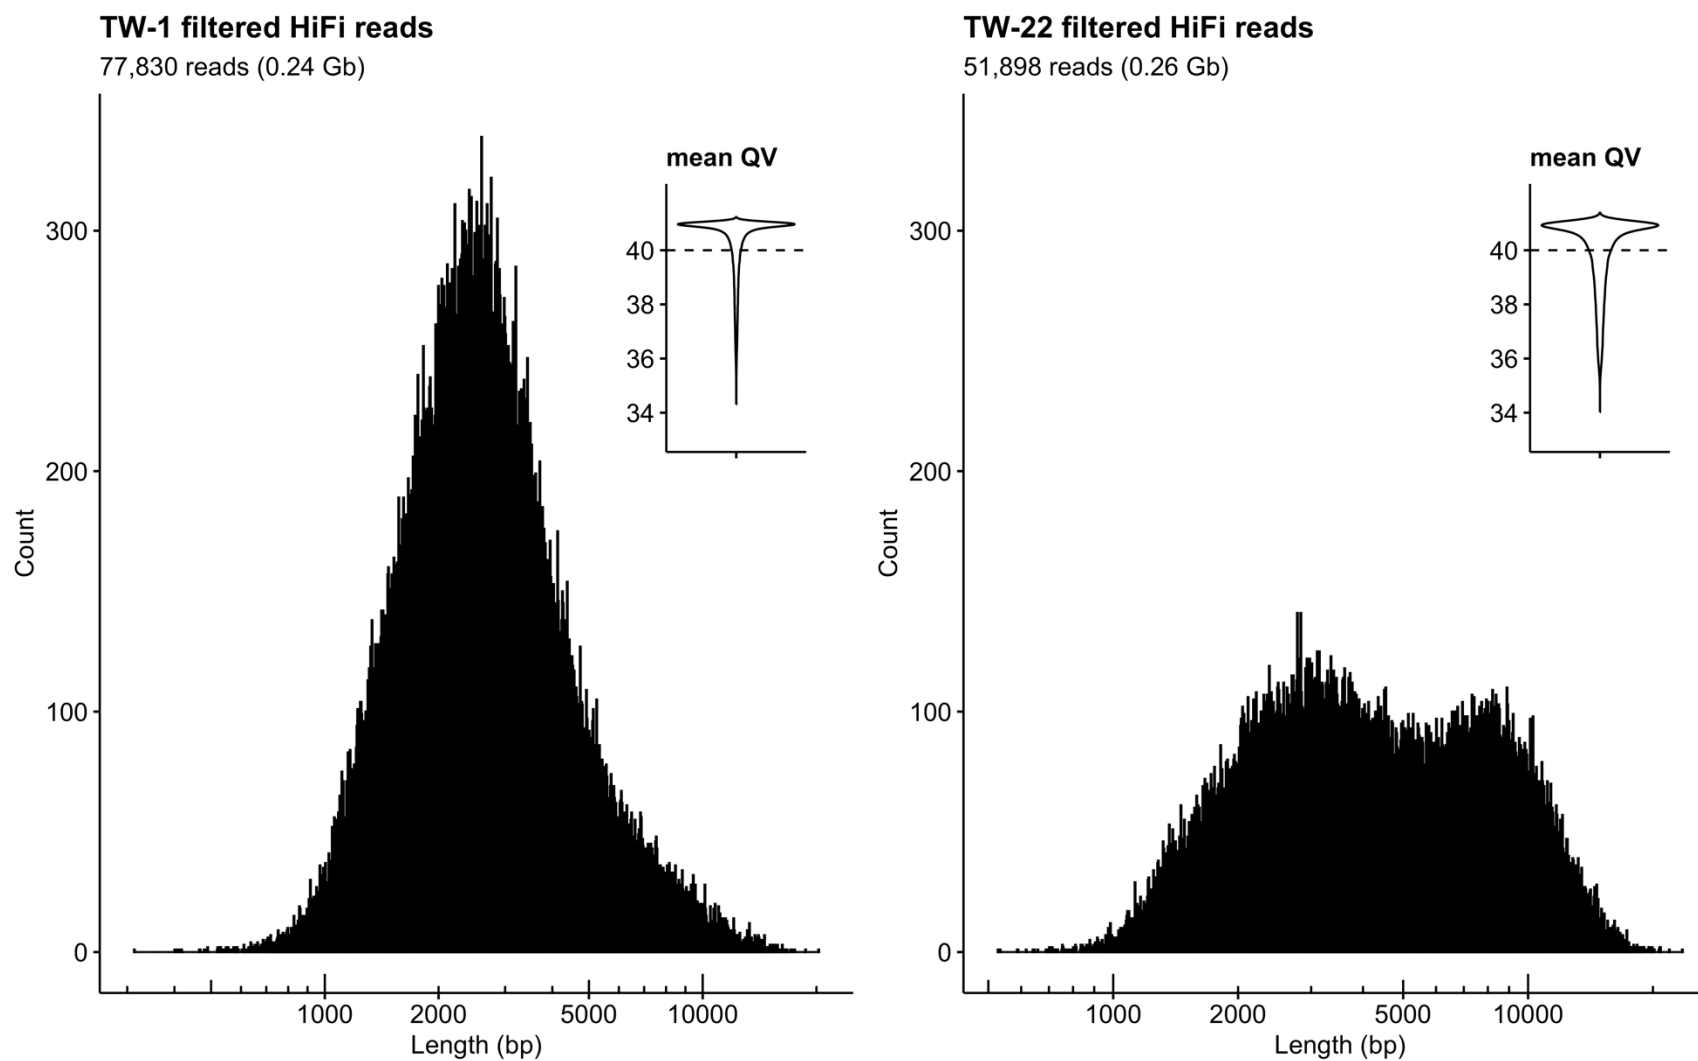

**Figure S2. Summary of filtered HiFi reads used for de novo assembly.** Quality values (QVs) were capped at 41 (representing  $<1$  in 10,000 probability of error) using Biopython 1.81, and mean QVs were calculated using qckitfastq 1.16.0.

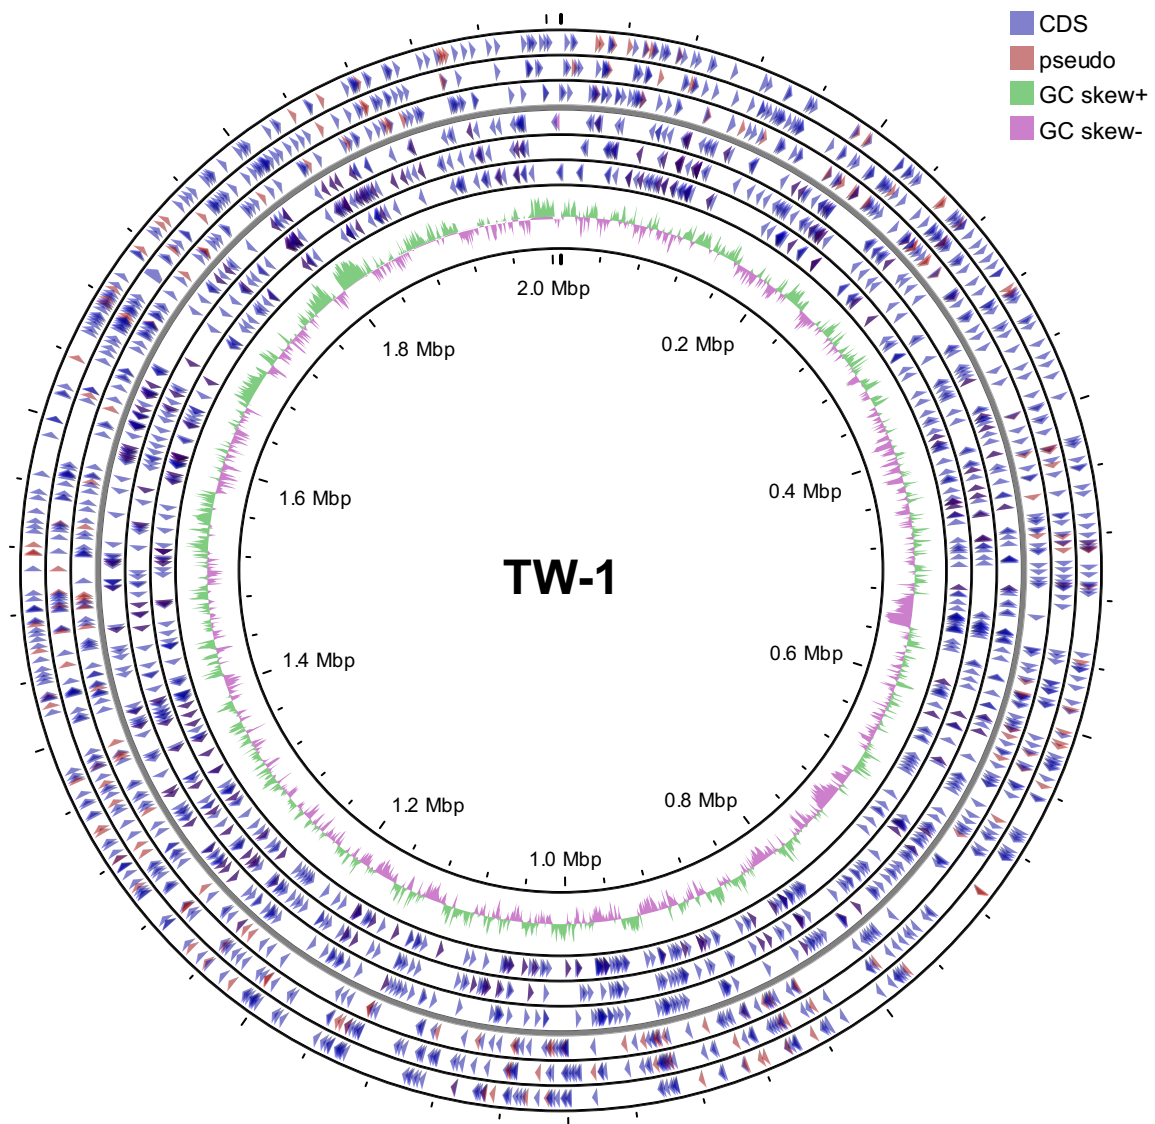

**Figure S3. Circular chromosome of *Orientia tsutsugamushi* strain TW-1.** CDS = protein-coding sequence; pseudo = pseudogene.

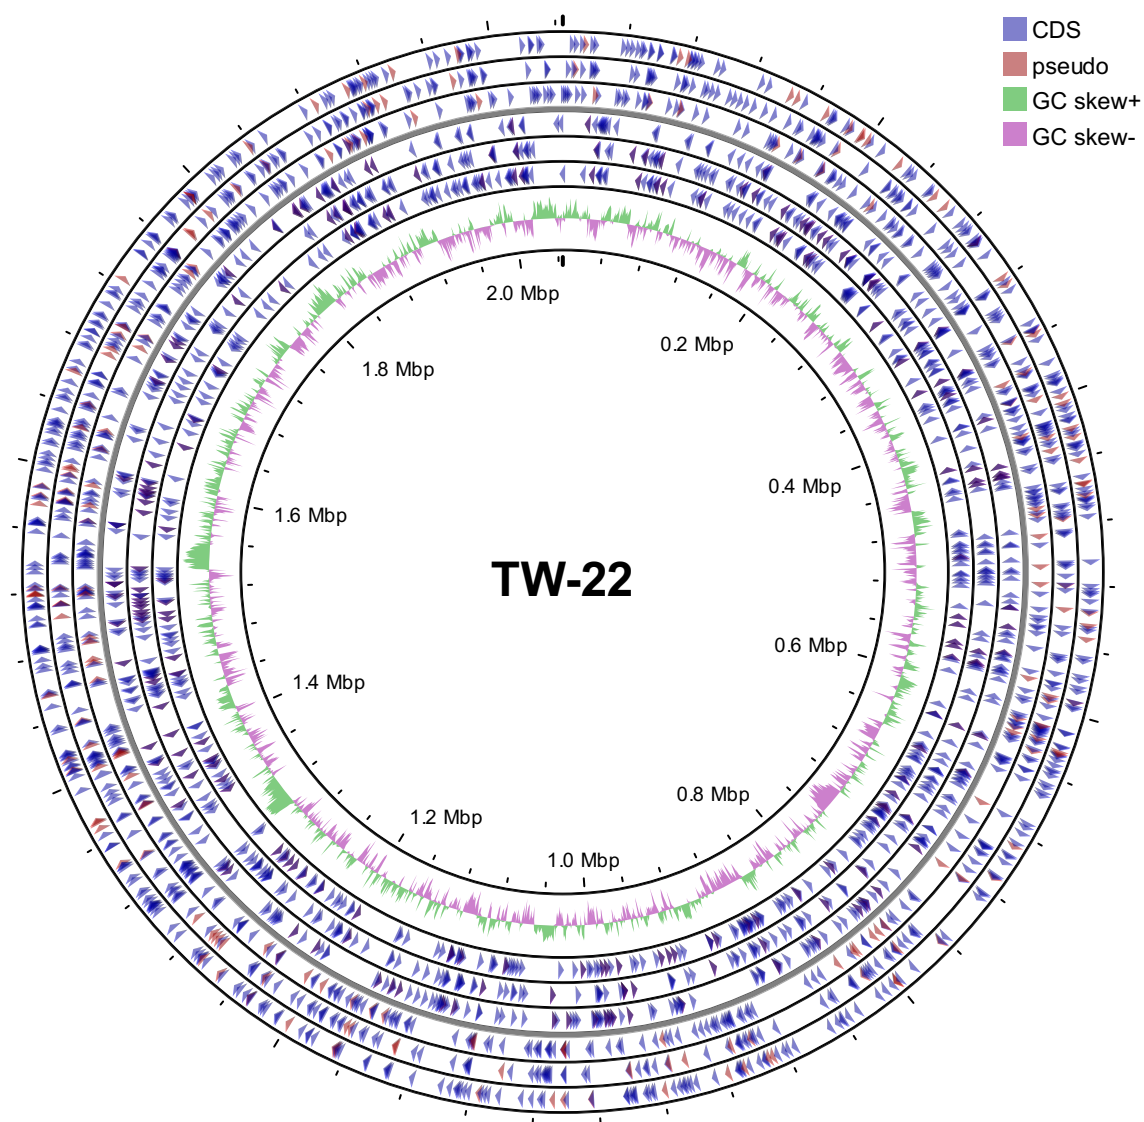

**Figure S4. Circular chromosome of *Orientia tsutsugamushi* strain TW-22.** CDS = protein-coding sequence; pseudo = pseudogene.

**Table S1. Pairwise amino acid alignments of *Orientia tsutsugamushi* surface antigens.**

| Strain   | TSA56                                         | ScaA                                            | ScaB                    | ScaC                                                       | ScaD                                            | ScaE                                          | ScaF                                          |
|----------|-----------------------------------------------|-------------------------------------------------|-------------------------|------------------------------------------------------------|-------------------------------------------------|-----------------------------------------------|-----------------------------------------------|
| Boryong  | <b>532 aa<br/>(reference)</b>                 | <b>1461 aa<br/>(reference)</b>                  | 649 aa; <b>2 copies</b> | <b>526 aa<br/>(reference)</b>                              | <b>998 aa<br/>(reference)</b>                   | <b>760 aa<br/>(reference)</b>                 | <b>absent</b>                                 |
| Ikeda    | 516 aa<br>(532 aa; 18,540<br>bits; 72.74% id) | 1508 aa<br>(1532 aa; 57,020<br>bits; 75.52% id) | <b>absent</b>           | 520 aa<br>(526 aa; 23,620<br>bits; 88.21% id)              | 834 aa<br>(998 aa; 30,700<br>bits; 69.34% id)   | 753 aa<br>(778 aa; 28,200<br>bits; 77.25% id) | <b>absent</b>                                 |
| Gilliam  | 524 aa<br>(532 aa; 21,860<br>bits; 82.89% id) | 1518 aa<br>(1529 aa; 58,610<br>bits; 77.17% id) | <b>absent</b>           | 517 aa<br>(526 aa; 23,590<br>bits; 88.78% id)              | 745 aa<br>(998 aa; 26,620<br>bits; 63.53% id)   | 757 aa<br>(774 aa; 28,280<br>bits; 76.74% id) | <b>absent</b>                                 |
| Karp     | 532 aa<br>(534 aa; 22,650<br>bits; 84.08% id) | 1514 aa<br>(1529 aa; 56,810<br>bits; 75.67% id) | <b>absent</b>           | 517 aa<br>(526 aa; 23,380<br>bits; 87.83% id)              | 988 aa<br>(1000 aa; 35,330<br>bits; 73.70% id)  | 755 aa<br>(772 aa; 26,510<br>bits; 72.54% id) | 645 aa<br>(645 aa; 32,750<br>bits; 99.38% id) |
| Kato     | 529 aa<br>(544 aa; 17,630<br>bits; 68.93% id) | 1447 aa<br>(1470 aa; 59,320<br>bits; 79.52% id) | <b>absent</b>           | 520 aa<br>(526 aa; 23,780<br>bits; 89.54% id)              | 872 aa<br>(998 aa; 34,060<br>bits; 73.35% id)   | 747 aa<br>(775 aa; 25,470<br>bits; 71.10% id) | <b>absent</b>                                 |
| TA686    | 532 aa<br>(536 aa; 19,540<br>bits; 75.37% id) | 1446 aa<br>(1464 aa; 57,020<br>bits; 77.66% id) | <b>absent</b>           | 517 aa<br>(526 aa; 23,570<br>bits; 88.78% id)              | 777 aa<br>(998 aa; 28,500<br>bits; 66.03% id)   | 756 aa<br>(774 aa; 26,720<br>bits; 73.00% id) | <b>645 aa<br/>(reference)</b>                 |
| UT76     | 536 aa<br>(543 aa; 21,380<br>bits; 81.22% id) | 1526 aa<br>(1531 aa; 57,350<br>bits; 75.11% id) | <b>absent</b>           | 517 aa<br>(526 aa; 23,360<br>bits; 87.26% id)              | 1035 aa<br>(1036 aa; 37,150<br>bits; 74.90% id) | 751 aa<br>(772 aa; 26,600<br>bits; 72.80% id) | <b>absent</b>                                 |
| UT176    | 533 aa<br>(534 aa; 22,630<br>bits; 83.52% id) | 1508 aa<br>(1533 aa; 56,530<br>bits; 75.21% id) | <b>absent</b>           | 520 aa<br>(526 aa; 23,830<br>bits; 88.97% id)              | 872 aa<br>(998 aa; 33,260<br>bits; 71.94% id)   | 747 aa<br>(765 aa; 26,690<br>bits; 73.33% id) | <b>absent</b>                                 |
| Wuj/2014 | 535 aa<br>(542 aa; 21,570<br>bits; 81.00% id) | 1524 aa<br>(1544 aa; 58,630<br>bits; 77.07% id) | <b>absent</b>           | 523 aa <sup>†</sup><br>(526 aa; 23,630<br>bits; 88.02% id) | 988 aa<br>(1002 aa; 37,420<br>bits; 77.15% id)  | 749 aa<br>(774 aa; 26,480<br>bits; 73.51% id) | <b>absent</b>                                 |
| TW-1     | 535 aa<br>(542 aa; 21,480<br>bits; 80.63% id) | 1531 aa<br>(1547 aa; 56,330<br>bits; 74.53% id) | <b>absent</b>           | 523 aa <sup>†</sup><br>(526 aa; 23,630<br>bits; 88.02% id) | 941 aa<br>(999 aa; 36,700<br>bits; 76.38% id)   | 749 aa<br>(774 aa; 26,420<br>bits; 73.39% id) | <b>absent</b>                                 |
| TW-22    | 524 aa<br>(539 aa; 18,160<br>bits; 71.24% id) | 1507 aa<br>(1525 aa; 57,870<br>bits; 79.38% id) | <b>absent</b>           | 520 aa<br>(526 aa; 23,900<br>bits; 89.16% id)              | 807 aa<br>(998 aa; 29,650<br>bits; 68.04% id)   | 748 aa<br>(772 aa; 26,180<br>bits; 72.80% id) | <b>absent</b>                                 |
|          | 68.93-99.63%<br>identity                      | 71.32-89.16%<br>identity                        | NA                      | 86.35-100%<br>identity                                     | 63.53-95.41%<br>identity                        | 71.10-99.73%<br>identity                      | NA                                            |

aa = amino acids; id = identity; <sup>†</sup> = identical

**Table S2. Summary of NCBI locus tags for surface antigens.**

|              | <b>Boryong</b><br>(AM494475) | <b>Ikeda</b><br>(AP008981) | <b>Gilliam</b><br>(LS398551) | <b>Karp</b><br>(LS398548) | <b>Kato</b><br>(LS398550) | <b>TA686</b><br>(LS398549) | <b>UT76</b><br>(LS398552) | <b>UT176</b><br>(LS398547) | <b>Wuj/2014</b><br>(CP044031) | <b>TW-1</b><br>(CP142421) | <b>TW-22</b><br>(CP142420) |
|--------------|------------------------------|----------------------------|------------------------------|---------------------------|---------------------------|----------------------------|---------------------------|----------------------------|-------------------------------|---------------------------|----------------------------|
| <b>TSA56</b> | OTBS_0602                    | OTT_0945                   | GILLIAM_02257                | KARP_02001                | KATO_00907                | TA686_02342                | UT76HP_01865              | UT176_00941                | F0363_02480                   | QU601_001572              | QU600_000493               |
| <b>ScaA</b>  | OTBS_0102                    | OTT_1215                   | GILLIAM_01513                | KARP_00798                | KATO_00211                | TA686_00130                | UT76HP_00328              | UT176_00529                | F0363_06280                   | QU601_000243              | QU600_001479               |
| <b>ScaB</b>  | OTBS_0864<br>OTBS_2137       |                            |                              |                           |                           |                            |                           |                            |                               |                           |                            |
| <b>ScaC</b>  | OTBS_1686                    | OTT_0460                   | GILLIAM_01556                | KARP_01628                | KATO_01770                | TA686_01405                | UT76HP_01782              | UT176_01268                | F0363_02065                   | QU601_001499              | QU600_000816               |
| <b>ScaD</b>  | OTBS_1913                    | OTT_1741                   | GILLIAM_01380                | KARP_00576                | KATO_00608                | TA686_00458                | UT76HP_02170              | UT176_00383                | F0363_04340                   | QU601_001941              | QU600_001734               |
| <b>ScaE</b>  | OTBS_2126                    | OTT_1766                   | GILLIAM_00783                | KARP_00606                | KATO_00640                | TA686_00866                | UT76HP_02139              | UT176_00408                | F0363_04165                   | QU601_001910              | QU600_001689               |
| <b>ScaF</b>  |                              |                            |                              | KARP_01610                |                           | TA686_01679                |                           |                            |                               |                           |                            |

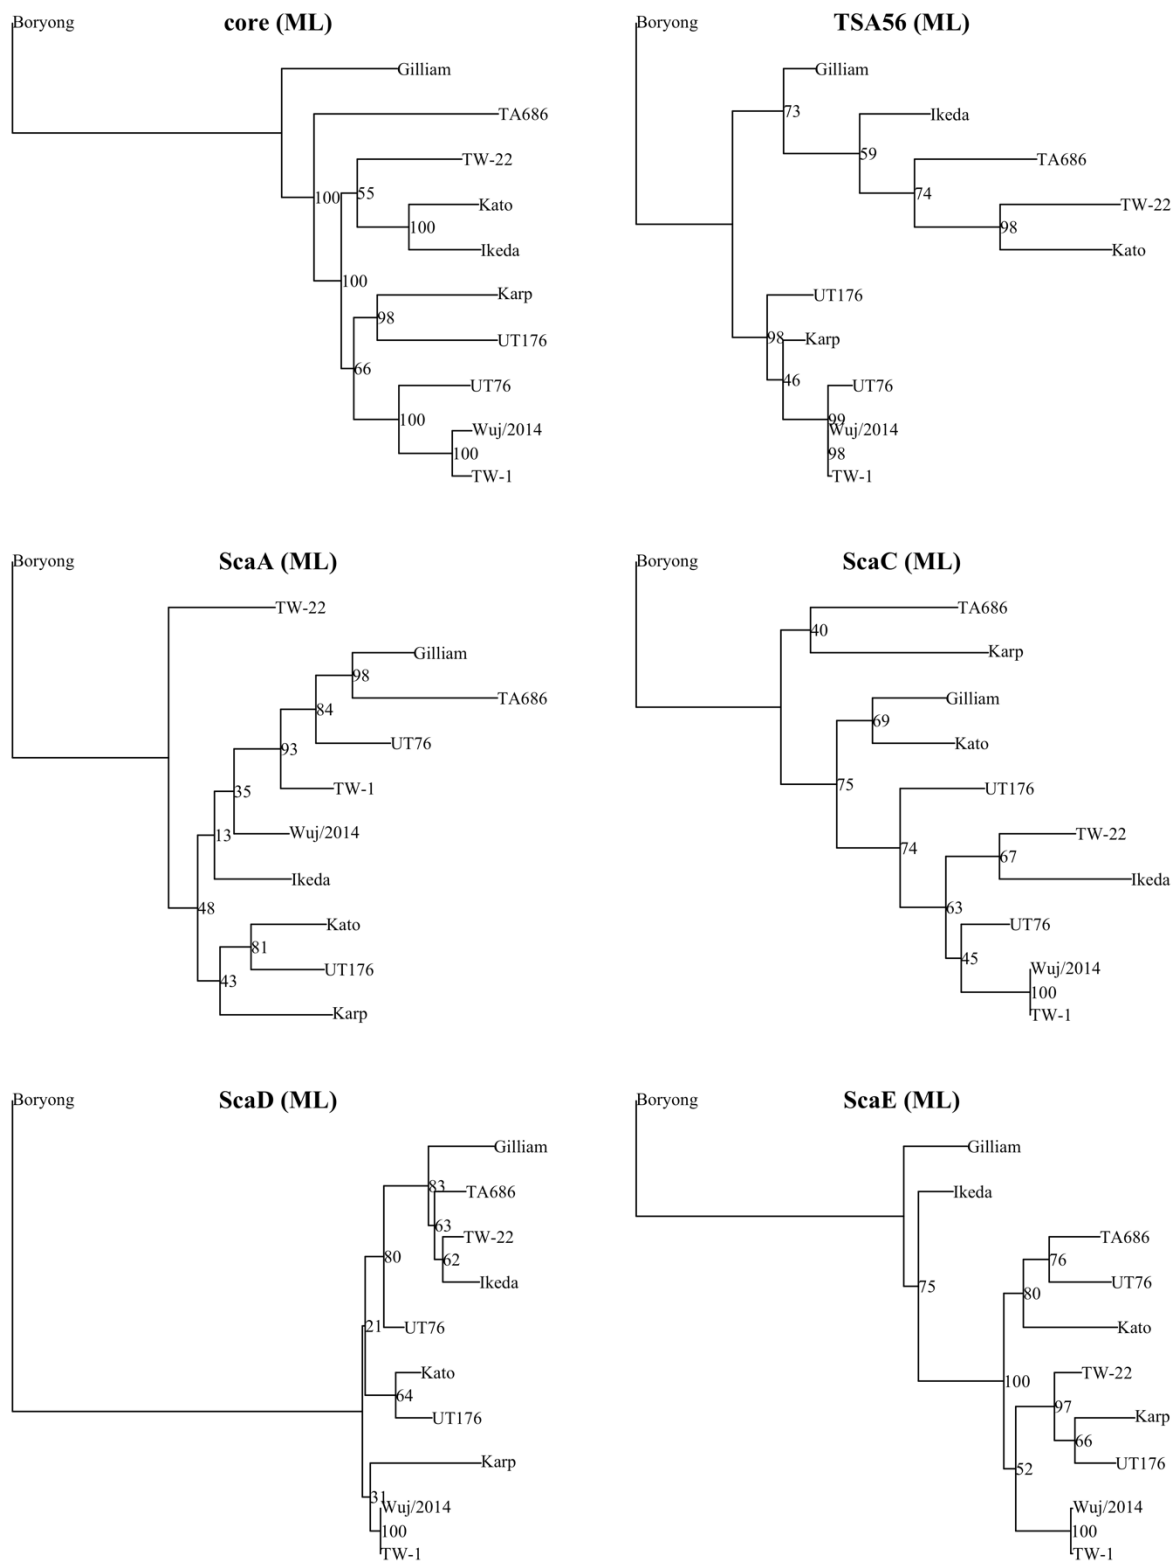

**Figure S5. Maximum likelihood phylogenetic trees based on individual amino acid sequences.**



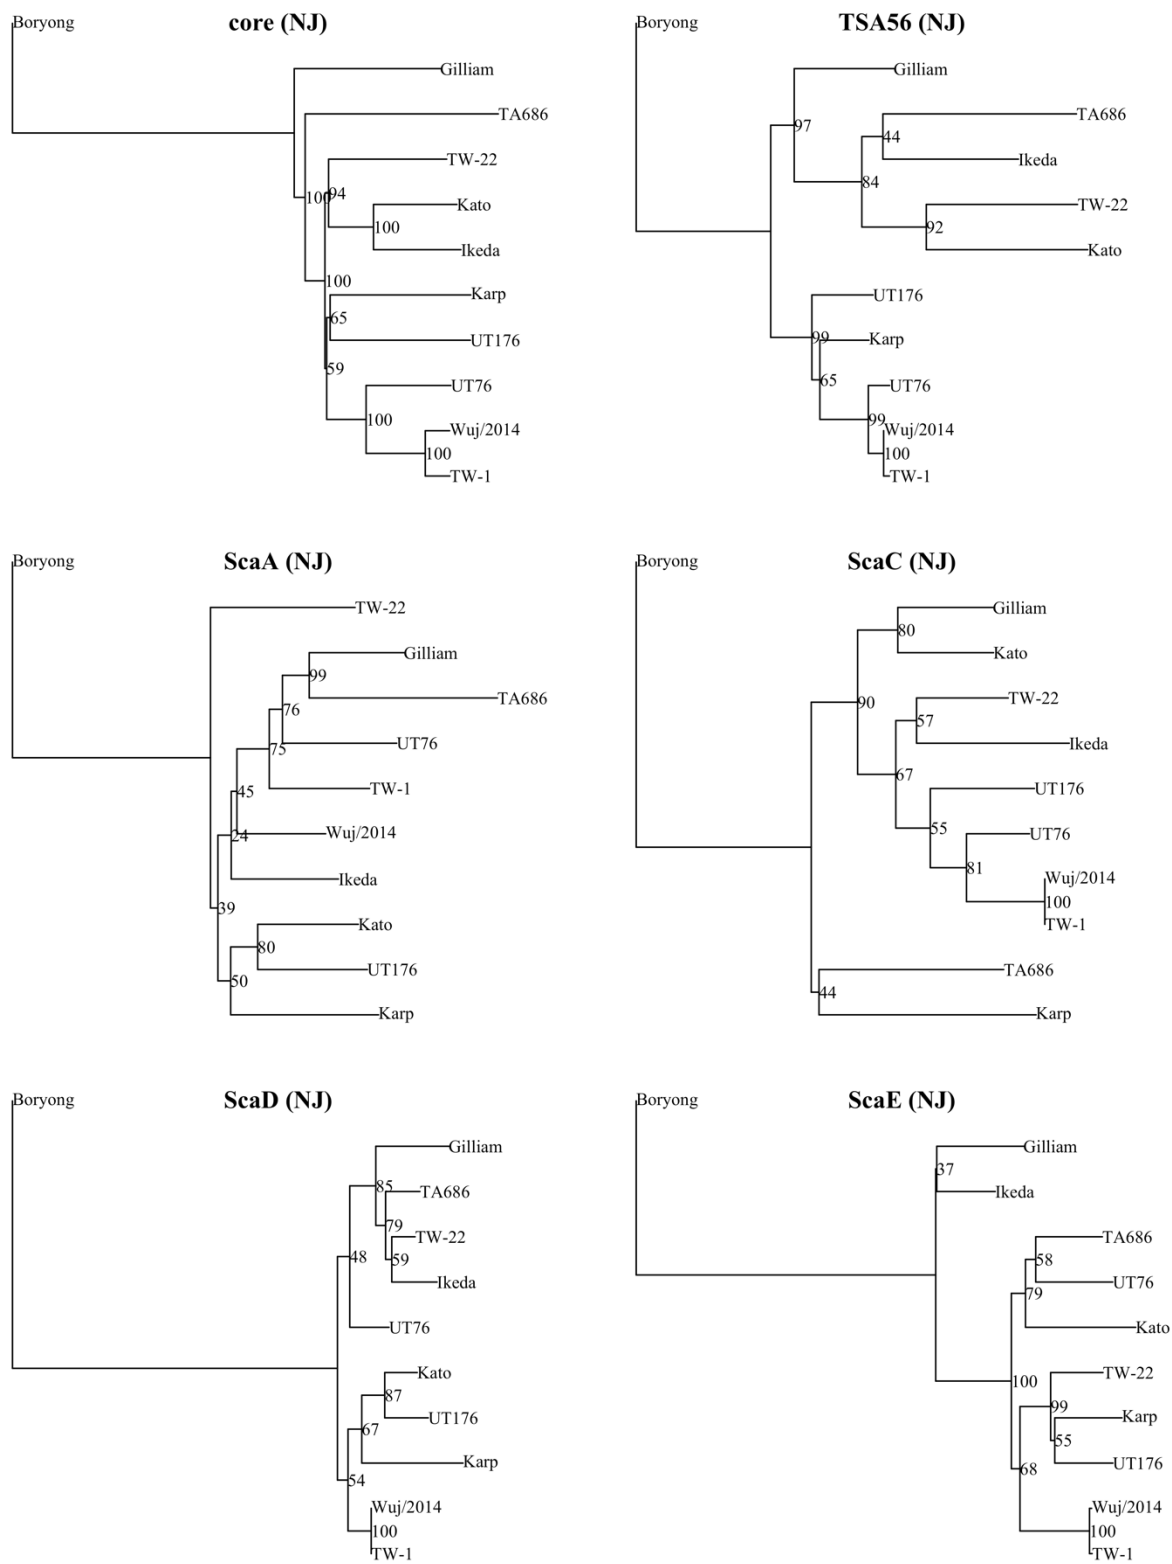

**Figure S6. Neighbor-joining phylogenetic trees based on individual amino acid sequences.**

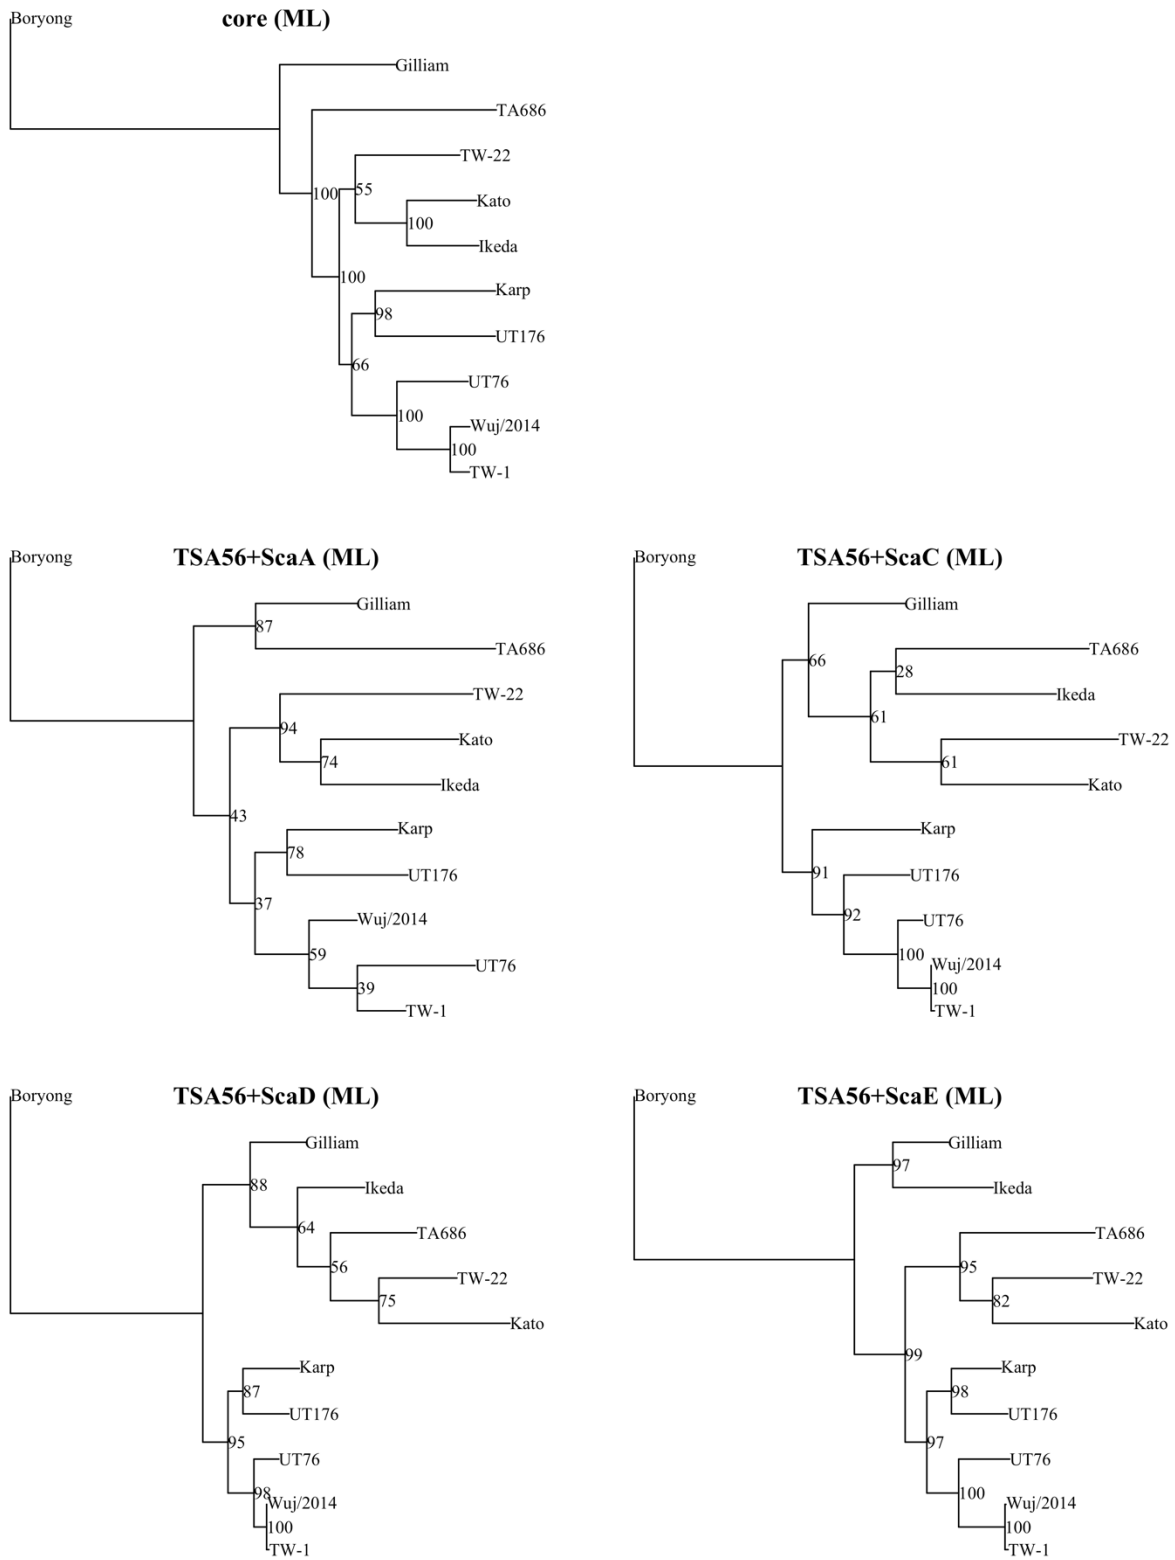

**Figure S7. Maximum likelihood phylogenetic trees based on concatenated amino acid sequences.**

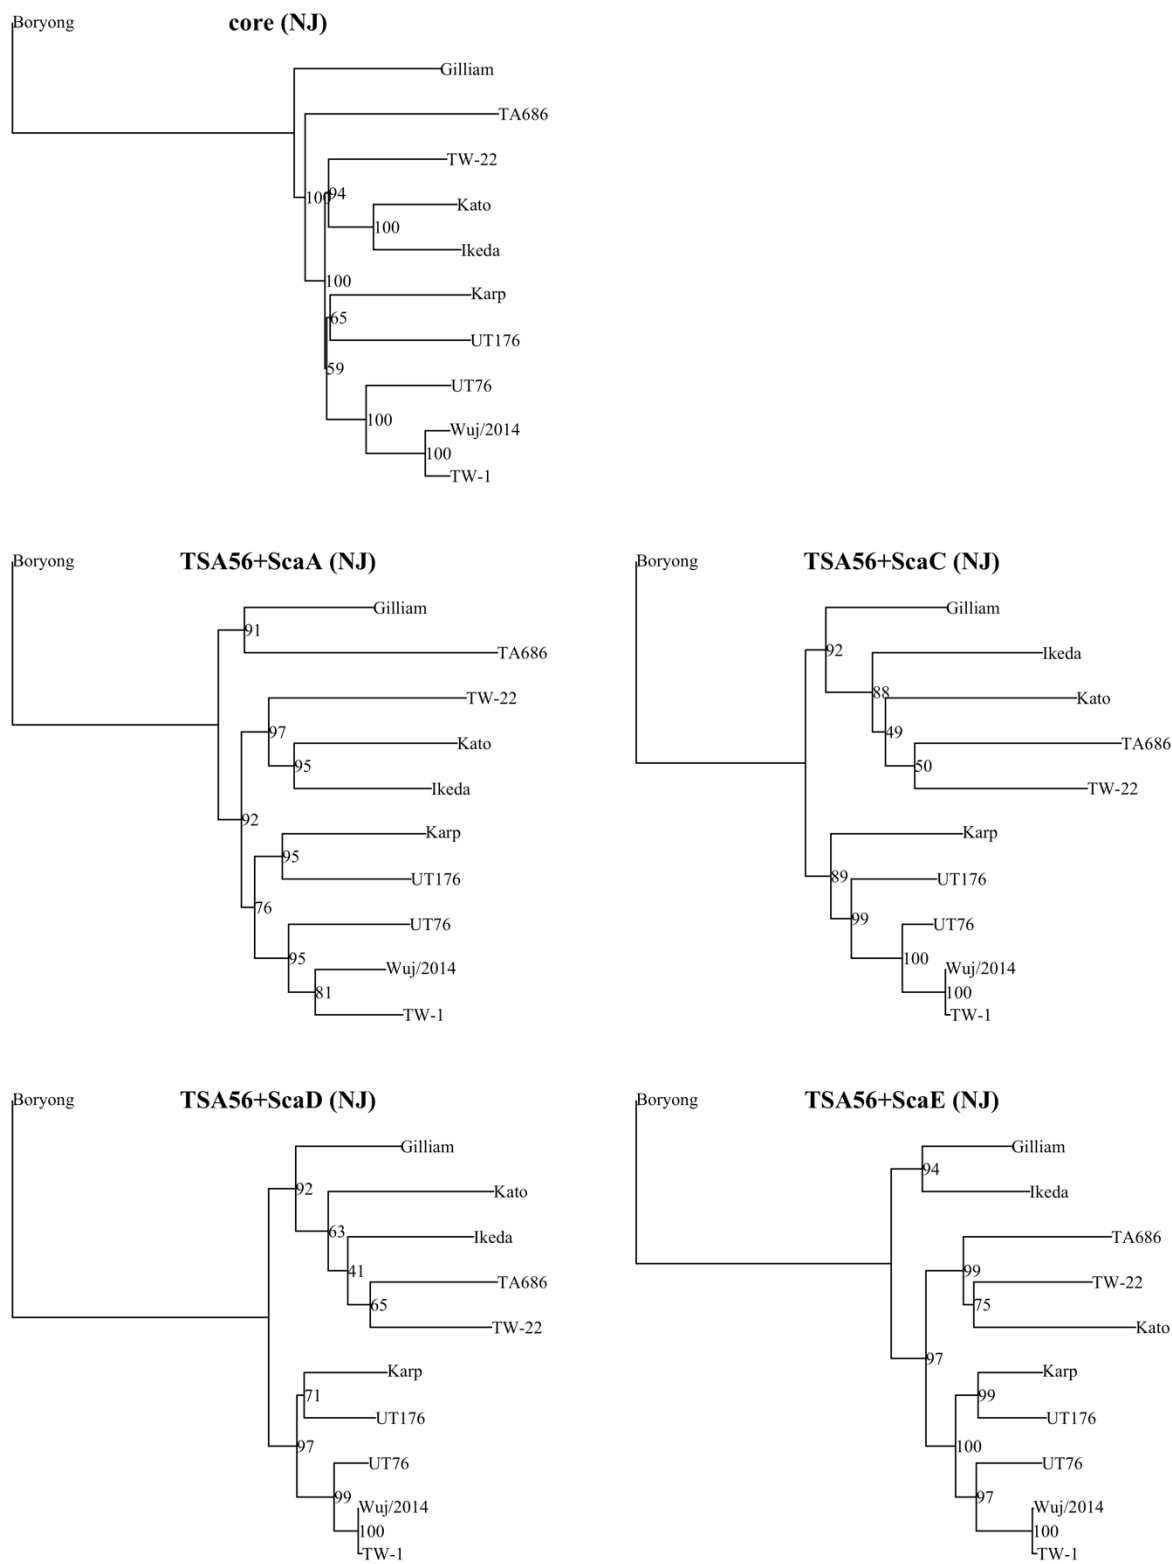

**Figure S8. Neighbor-joining phylogenetic trees based on concatenated amino acid sequences.**
